# Supplementary material for: Persistent telomere cohesion protects aged cells from premature senescence
Source: PubMed Central journal article supplement (PMC7335080; doi:10.1038/s41467-020-17133-4), 2020-07-03
Supplement: 41467_2020_17133_MOESM1_ESM.pdf [file 41467_2020_17133_MOESM1_ESM.pdf]

## **Supplementary Information**

### **Persistent telomere cohesion protects aged cells from premature senescence**

**Azarm et al.**

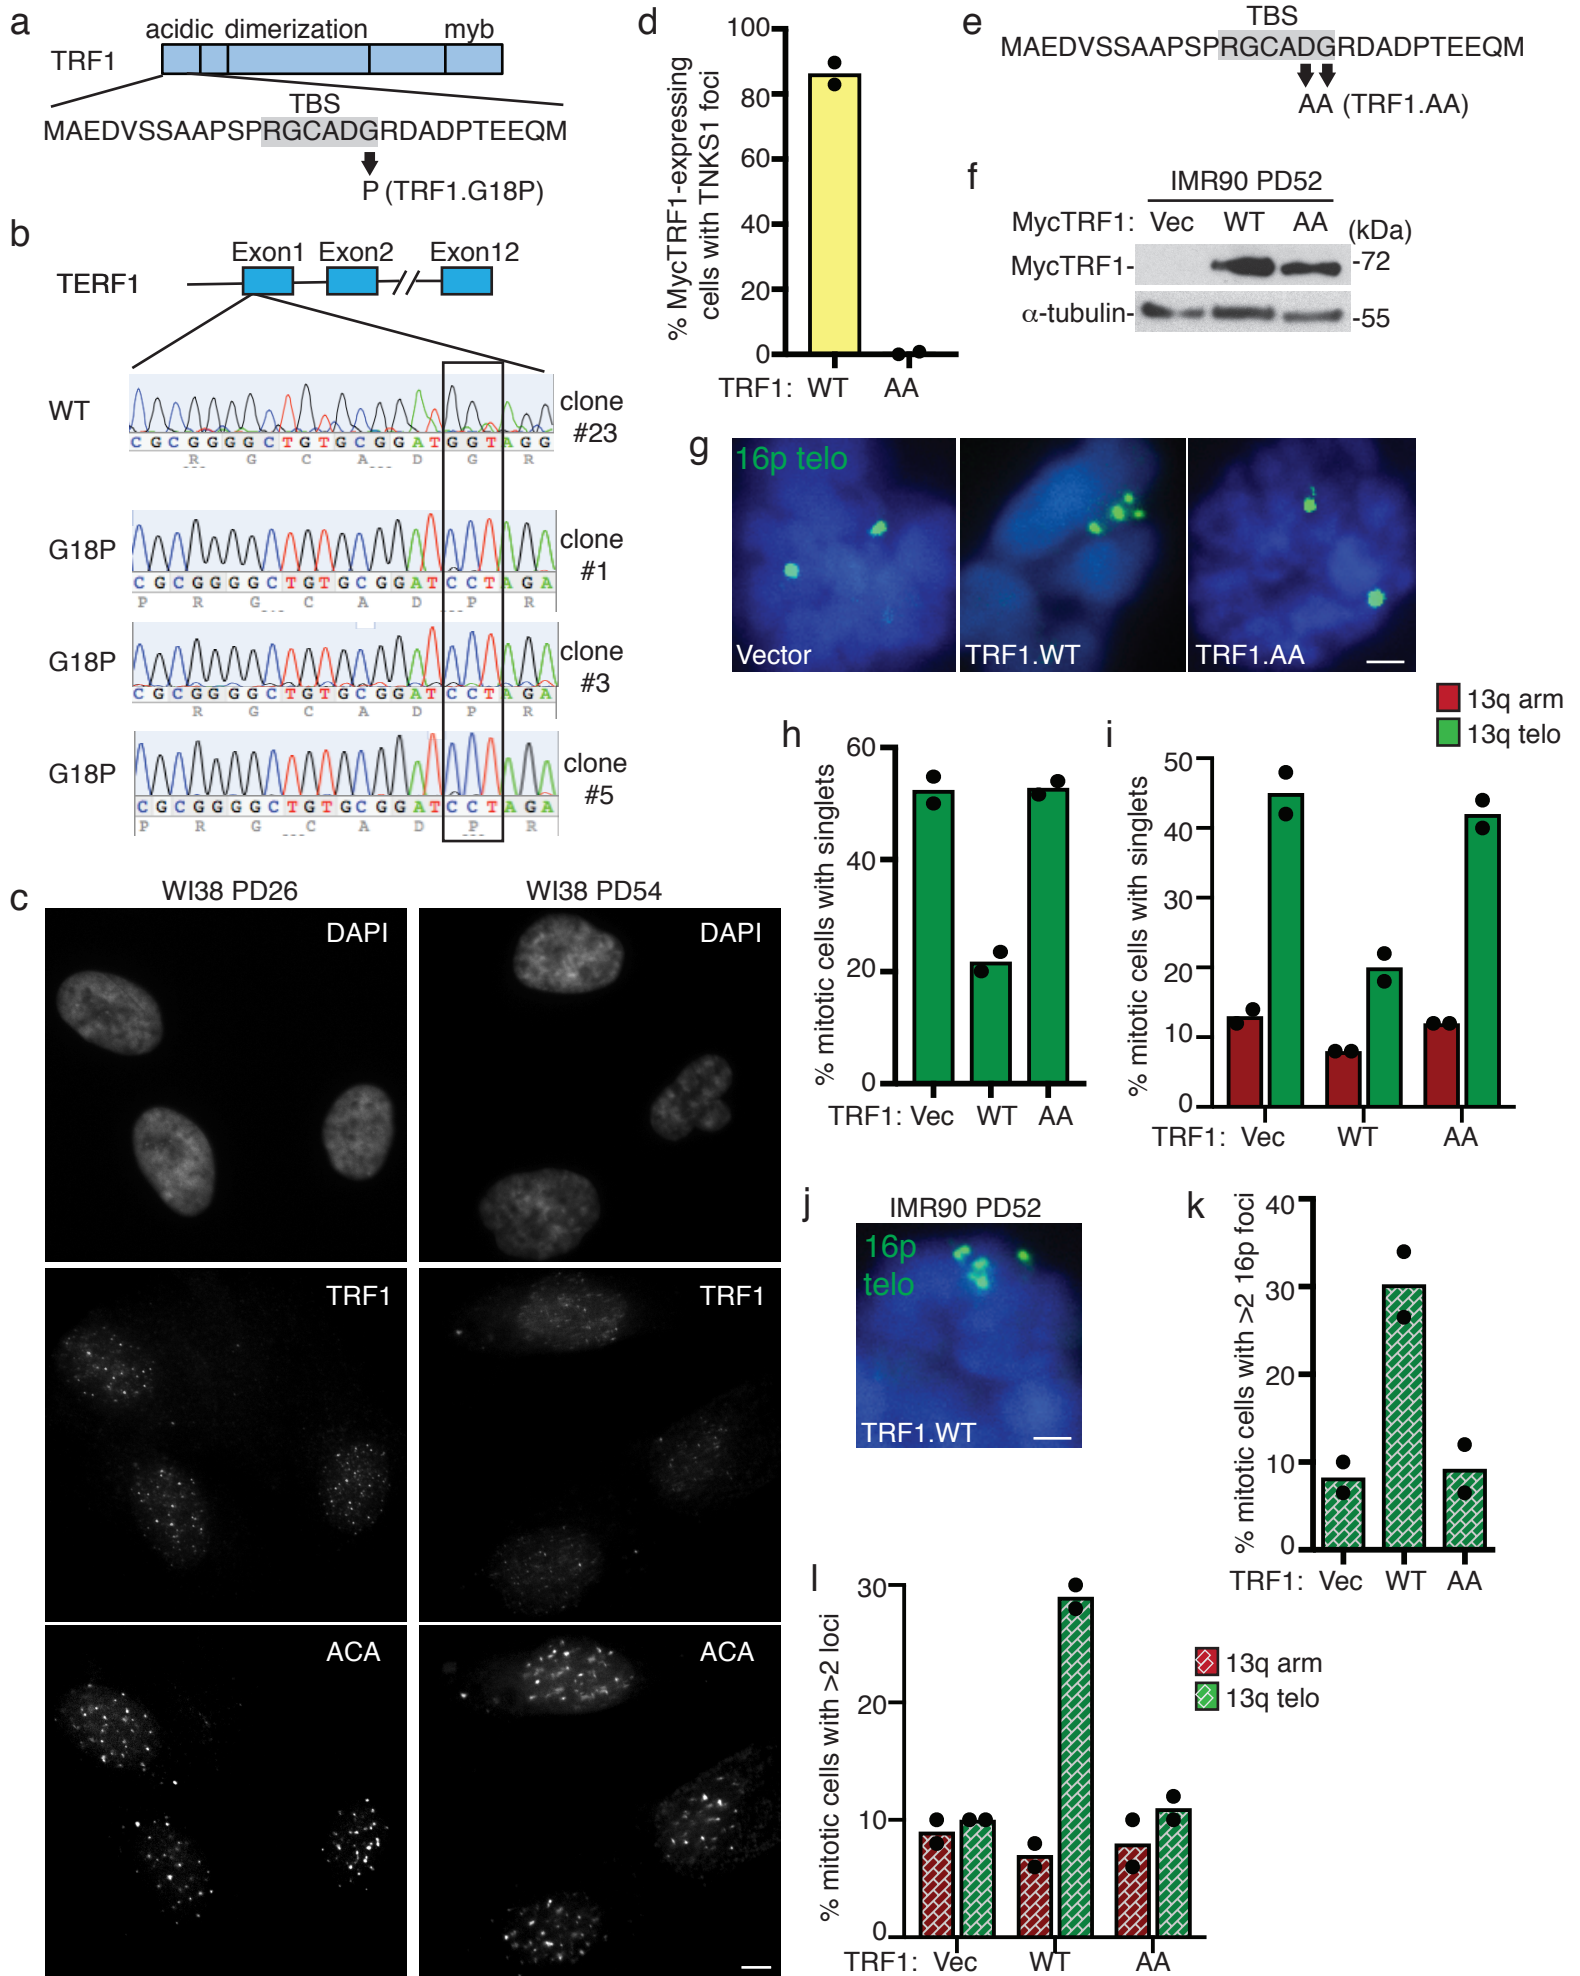

**Supplementary Figure 1. Analysis of TRF1.WT versus TRF1.AA in aged primary cells.**

**a** Schematic diagram highlighting the G18P point mutation generated in HEK293T cells by CRISPR/Cas9 in the tankyrase-binding site (TBS) of TRF1. **b** Schematic diagram and corresponding sequence traces for the tankyrase-binding site of TRF1 in one wild-type HEK293T clone (#23) and three G18P mutant clones (#1, #3, #5). **c** Immunofluorescence analysis of early (PD26) or late (PD54) WI38 cells using anti-TRF1 or anti-centromere (ACA) antibodies. Scale bars represent 5  $\mu$ m. Images were captured and reproduced under the same conditions and settings. **d** Quantification of the frequency of MycTRF1(WT or AA)-expressing transfected late (PD52) WI38 cells with tankyrase foci. Average of two independent experiments ( $n \geq 87$  cells each). **e** Schematic diagram highlighting the AA point mutation generated in MycTRF1.WT in the tankyrase-binding site (TBS). **f** Immunoblot analysis of Vector, TRF1.WT, or TRF1.AA transfected late (PD52) IMR90 cell extracts. **g** FISH analysis of Vector, TRF1.WT, or TRF1.AA transfected late (PD52) IMR90 mitotic cells using a 16p telo probe (green). **h** Quantification of the frequency of IMR90 mitotic cells with cohered telomeres. Average of two independent experiments ( $n \geq 31$  cells each). **i** Quantification of the frequency of mitotic cells with cohered telomeres and arms from FISH analysis of Vector, TRF1.WT, or TRF1.AA transfected late (PD50) WI38 mitotic cells using a dual 13q arm (red) and telo (green) probe. Average of two independent experiments ( $n = 50$  cells each). **j** FISH analysis of a TRF1.WT transfected late (PD52) IMR90 mitotic cell exhibiting subtelomere copying using a 16p telo probe (green). **k** Quantification of the frequency of mitotic cells exhibiting subtelomere copying. Average of two independent experiments ( $n \geq 31$  cells each). **l** Quantification of the frequency of mitotic cells exhibiting subtelomere copying from FISH analysis of Vector, TRF1.WT, or TRF1.AA transfected late (PD50) WI38 mitotic cells using a dual 13q arm (red) and telo (green) probe. Average of two independent experiments ( $n = 50$  cells each). (**g, j**) DNA was stained with DAPI (blue). Scale bars represent 2  $\mu$ m. Experiments were repeated independently twice (for **c, f, g, j**) with similar results. Source data are provided as a Source Data file.

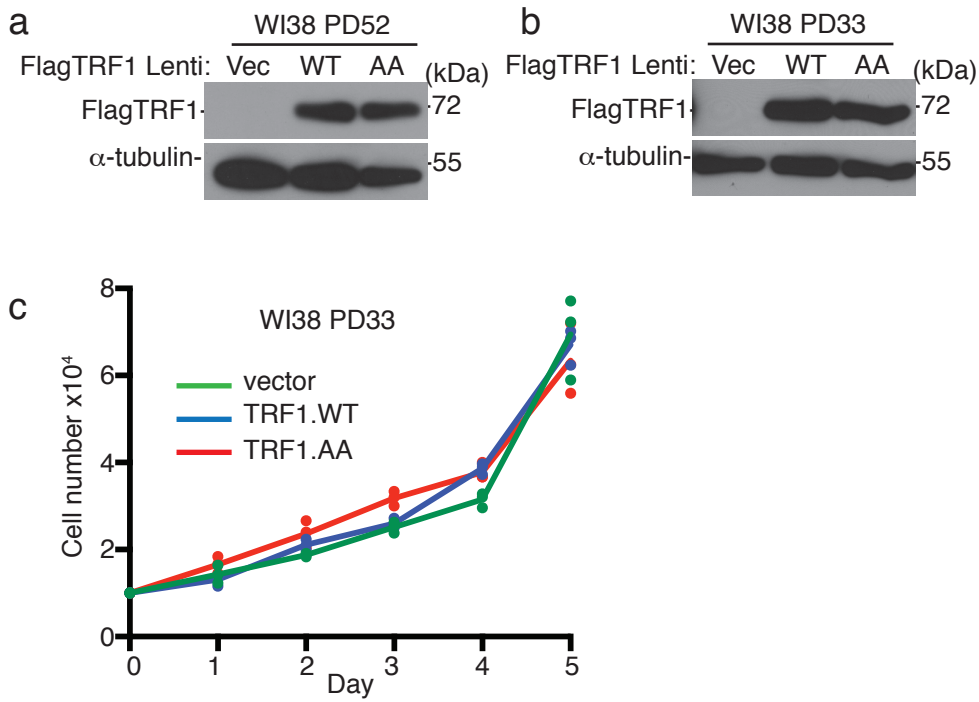

**Supplementary Figure 2. TRF1.WT does not affect growth in young WI38 cells.**

**a, b** Immunoblot analysis of Vector, TRF1.WT, or TRF1.AA infected (**a**) late (PD52) or (**b**) early (PD33) WI38 cell extracts. **c** Growth curve analysis of Vector, TRF1.WT, or TRF1.AA infected early (PD33) WI38 cells from three technical replicates. Experiments were repeated independently twice (for **a, b**) with similar results. Source data are provided as a Source Data file.

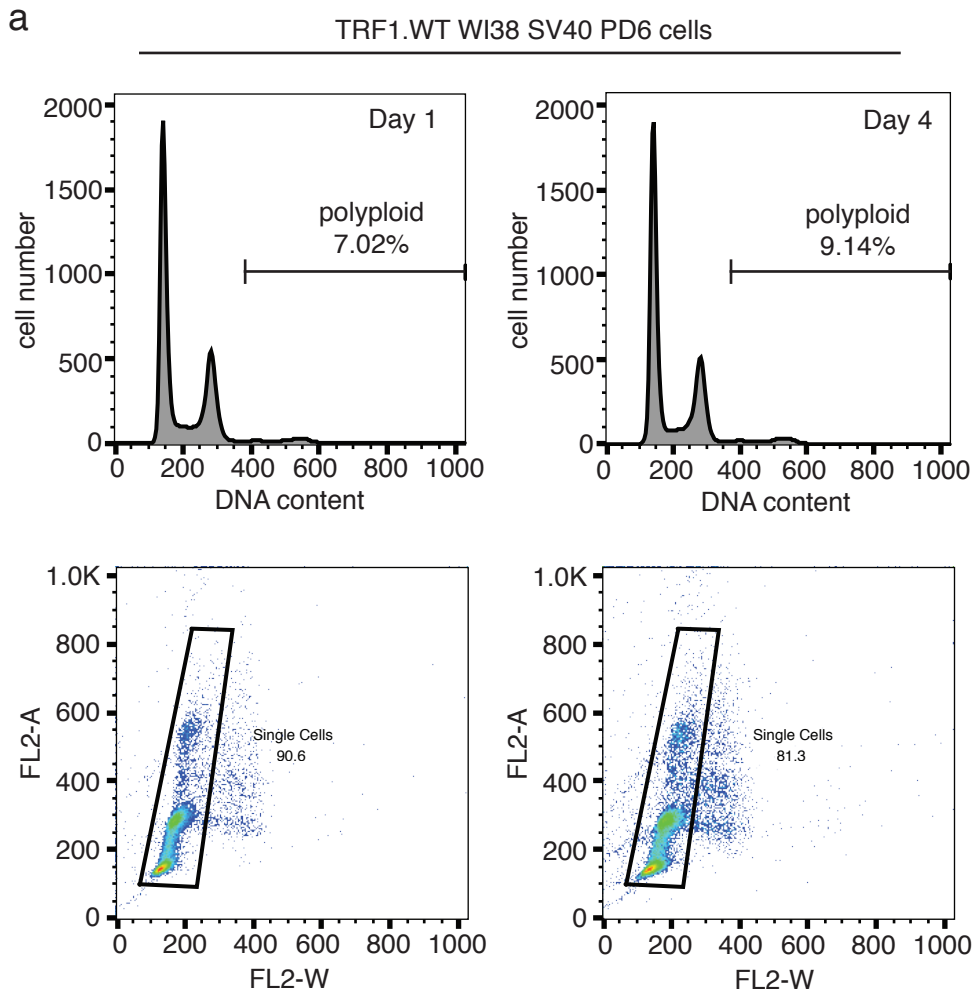

**Supplementary Figure 3. TRF1.WT does not affect ploidy in SV40 transformed WI38 cells.**

a FACS cell cycle analysis of TRF1.WT infected WI38 SV40-LT (PD6) cells on Day 1 and 4 (n=approximately 20,000 events each). The percentage of events with >4N DNA content (polyploid) is shown. The gating strategy is shown below for each. Single cells were gated (boxed area) and used to generate the histograms.

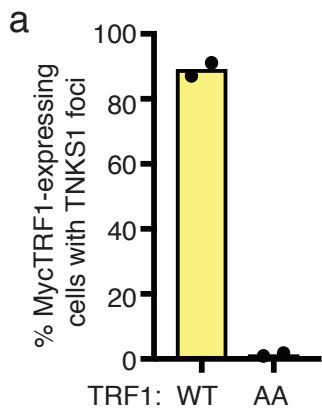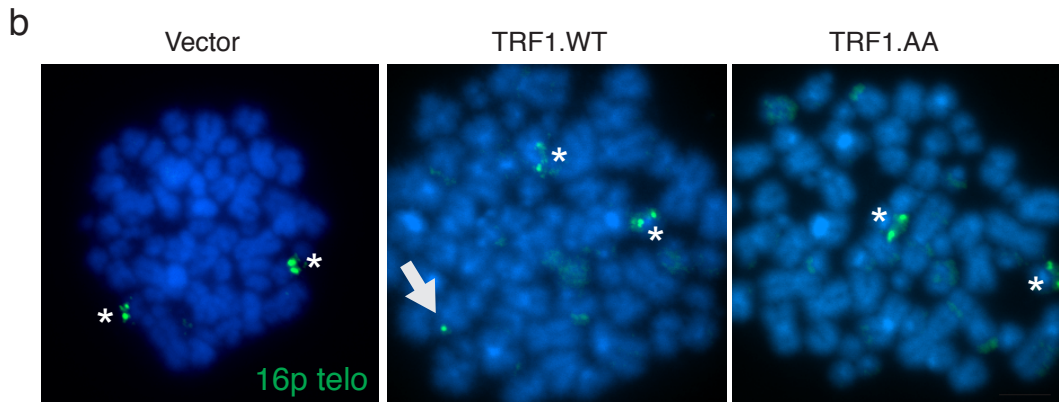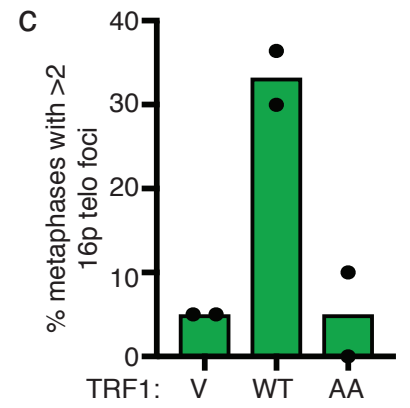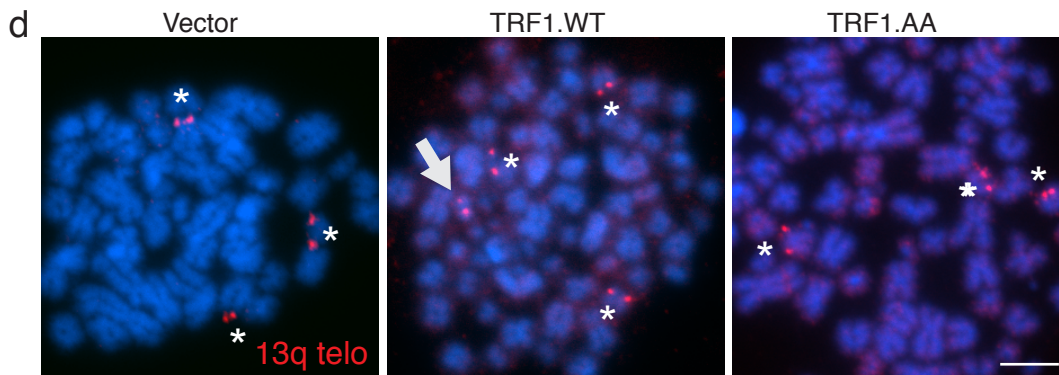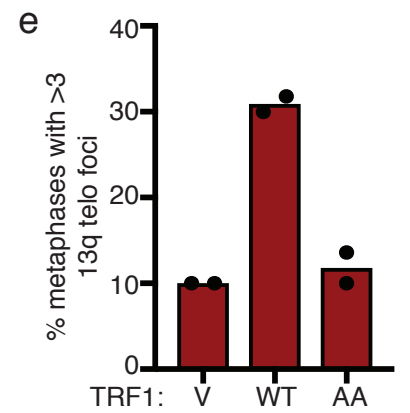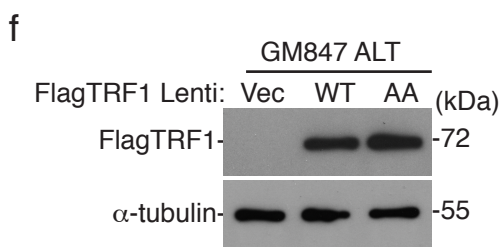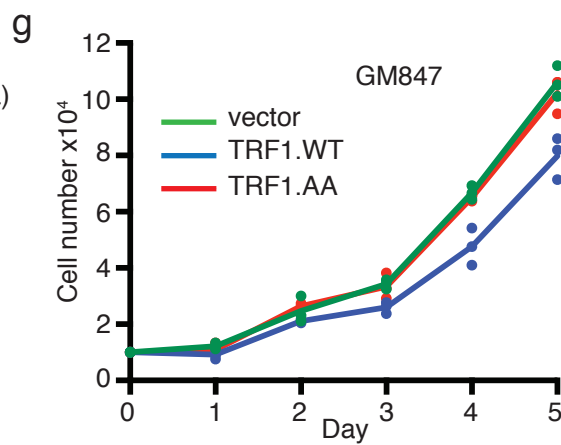

**Supplementary Figure 4. Analysis of TRF1.WT versus TRF1.AA in ALT cancer cells.**

**a** Quantification of the frequency of MycTRF1(WT or AA)-expressing transfected GM847 cells with tankyrase foci. Average of two independent experiments ( $n \geq 101$  cells each). **b, d** FISH analysis of metaphase spreads from Vector, TRF1.WT, or TRF1.AA transfected U2OS cells using **(b)** 16p (green) or **(d)** 13q (triploid in U2OS cells) (red) telo probes. Asterisks indicate usual chromosome number and arrow indicates extra subtelomere copy. **c, e** Quantification of the frequency of metaphases with an extra **(c)** 16p or **(e)** 13q signal. DNA was stained with DAPI (blue). Scale bar represent 5  $\mu\text{m}$ . Average of two independent experiments ( $n \geq 20$  cells each). **f** Immunoblot analysis of Vector, TRF1.WT, or TRF1.AA infected GM847 cell extracts. **g** Growth curve analysis of Vector, TRF1.WT, or TRF1.AA infected GM847 cells from three technical replicates. **(b, d)** DNA was stained with DAPI (blue). Scale bars represent 2  $\mu\text{m}$ . Experiments were repeated independently twice (for **b, d, f**) with similar results. Source data are provided as a Source Data file.

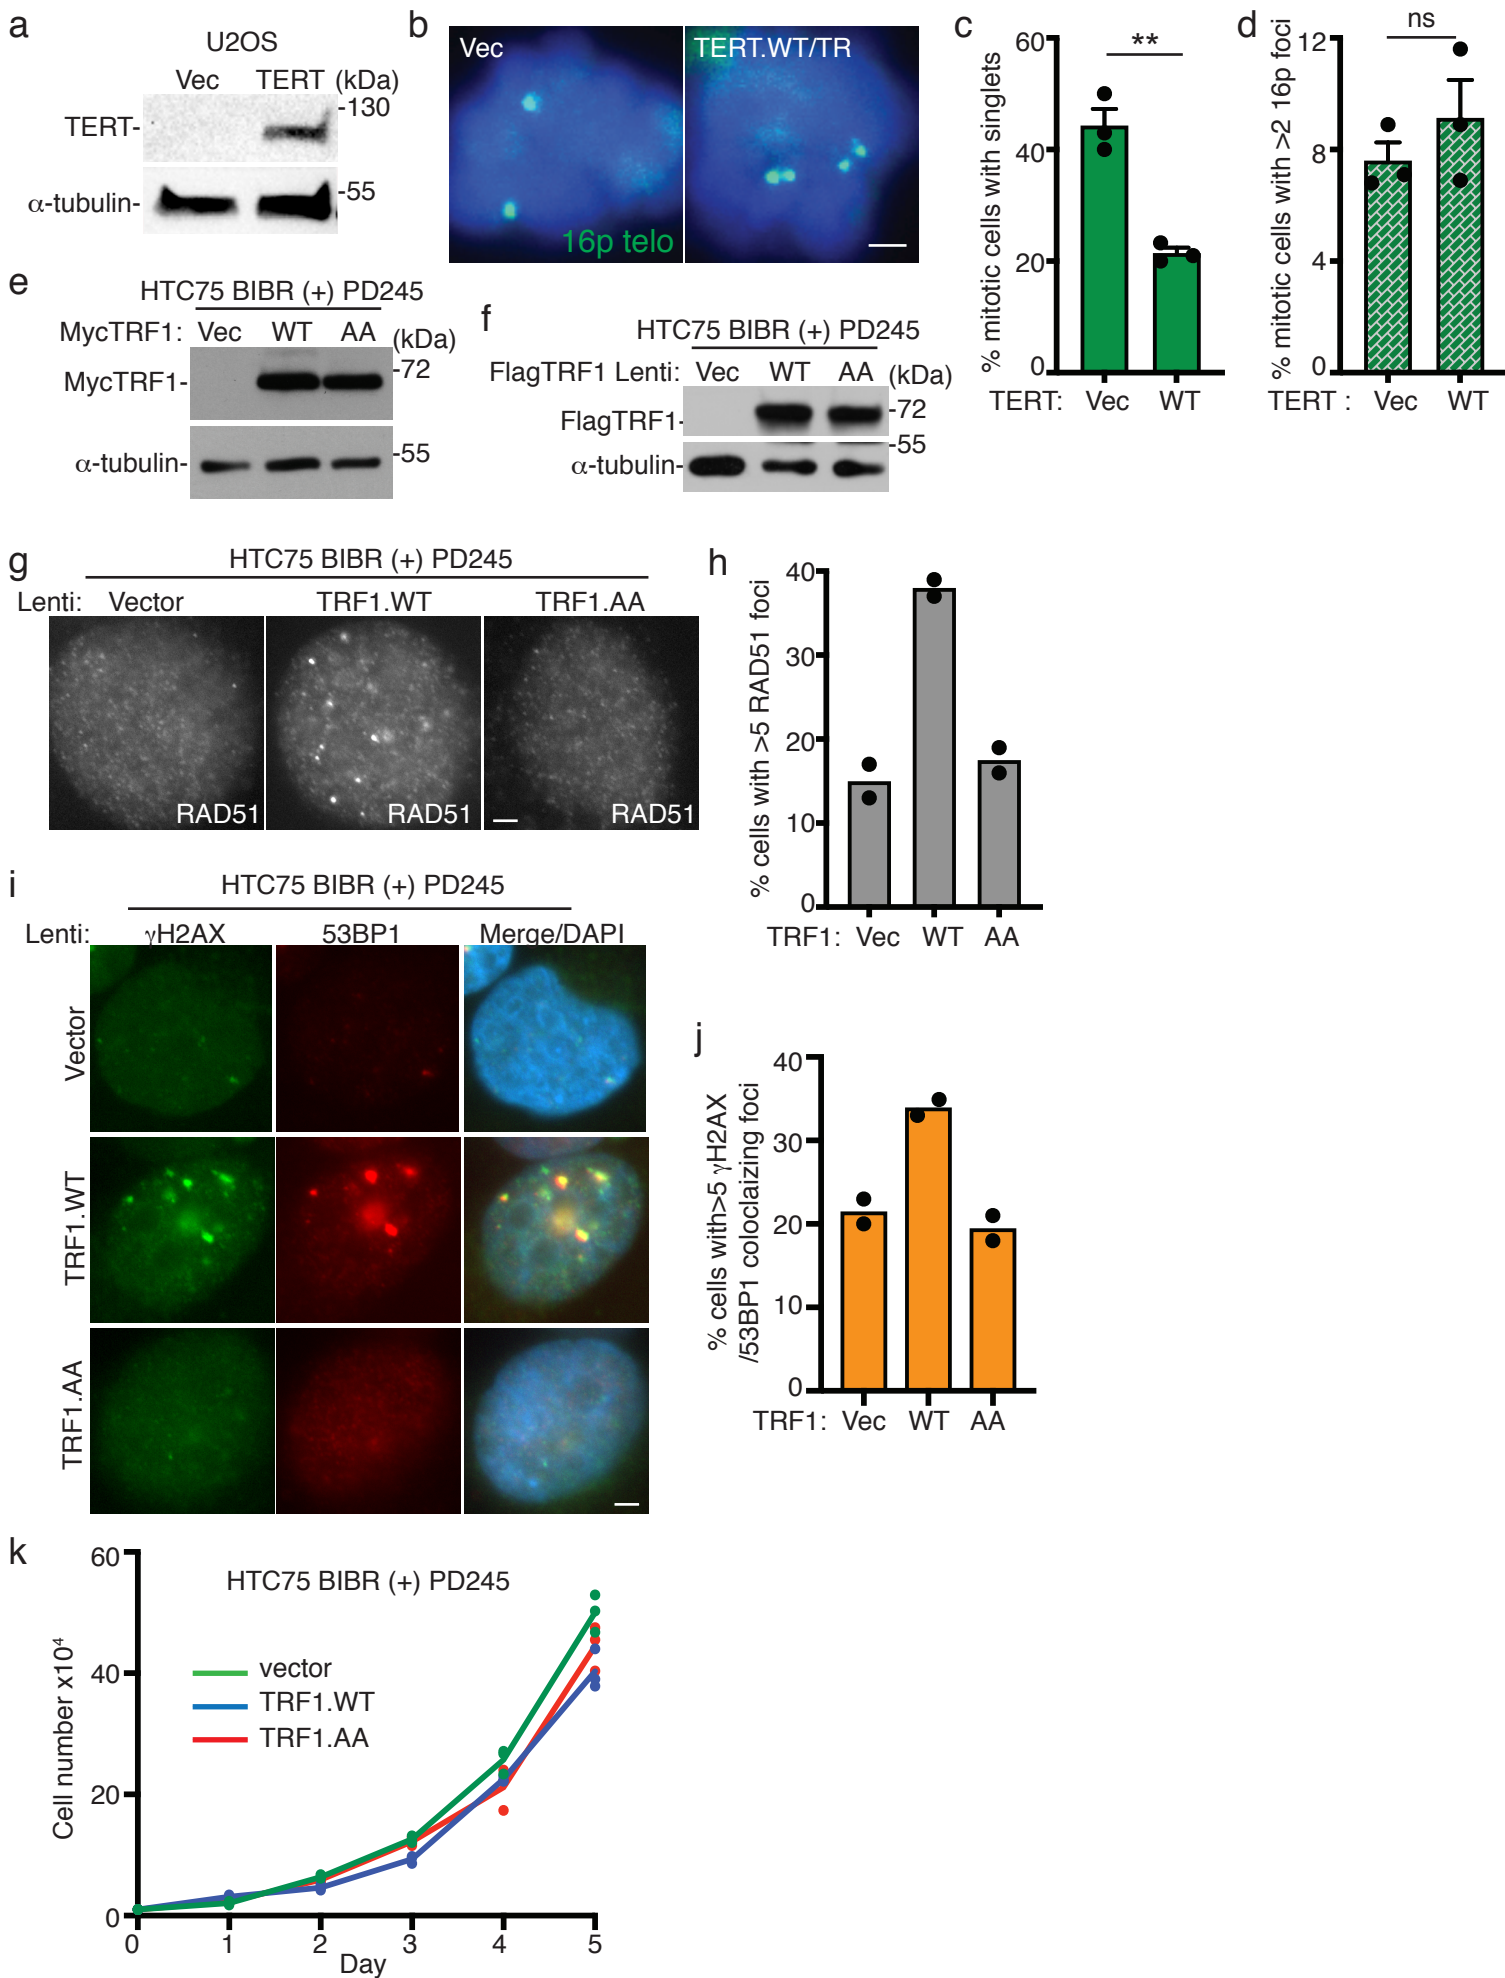



**Supplementary Figure 5. Consequences of telomerase overexpression or inhibition.**

**a** Immunoblot analysis of Vector and TERT.WT/TR transfected U2OS cell extracts.

**b** FISH analysis of Vector or TERT.WT/TR transfected U2OS mitotic cells using a 16p telo probe (green). DNA was stained with DAPI (blue). Scale bar represents 2  $\mu\text{m}$ . **c, d**

Quantification of the frequency of mitotic cells (**c**) with cohered telomeres or (**d**) exhibiting subtelomere copying. Average of three independent experiments ( $n \geq 42$  cells each)  $\pm$  SEM. **c**

Vec vs WT:  $p = 0.0074$ . **d** Vec vs WT:  $p = 0.4472$ . **e** Immunoblot analysis of Vector,

TRF1.WT, or TRF1.AA transfected HTC75 BIBR (+) PD245 cell extracts. **f** Immunoblot

analysis of Vector, TRF1.WT, or TRF1.AA infected HTC75 BIBR (+) PD245 cell extracts. **g**

Immunofluorescence analysis of Vector, TRF1.WT, or TRF1.AA infected HTC75 BIBR (+)

PD245 cells with RAD51 antibody. **h** Quantification of the frequency of cells displaying  $>5$

RAD51 foci. Average of two independent experiments ( $n = 100$  cells each). **i**

Immunofluorescence analysis of Vector, TRF1.WT, or TRF1.AA infected HTC75 BIBR (+)

PD245 cells with  $\gamma\text{H2AX}$  (green) and 53BP1 (red) antibodies. **j** Quantification of the frequency

of cells displaying  $>5$   $\gamma\text{H2AX}/53\text{BP1}$  colocalizing foci. Average of two independent

experiments ( $n \geq 100$  cells each). **k** Growth curve analysis of Vector, TRF1.WT, or TRF1.AA

infected HTC75 BIBR (+) PD245 cells from three technical replicates. (**b, i**) DNA was stained

with DAPI (blue). Scale bars represent 2  $\mu\text{m}$ .  $**p \leq 0.01$ , (ns) not significant, Student's

unpaired two-sided t test. Experiments were repeated independently three times (for **a, b,**)

and twice (for **e, f, g, i**) with similar results. Source data are provided as a Source Data file.
